# Supplementary material for: The Association of Age, Sex, and BMI on Lower Limb Neuromuscular and Muscle Mechanical Function in People with Multiple Sclerosis
Source: MDPI journal article supplement (doi:10.3390/biomedicines12050971), 2024-04-28
Supplement: s1 [file s1]

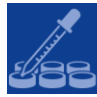

**Supplementary Table S1:** CMJ characteristic in pwMS and HC according to sex, age and BMI

| Sex                    |        |       | AGE  |              |               |    |              |               | BMI   |    |              |               |    |              |               |
|------------------------|--------|-------|------|--------------|---------------|----|--------------|---------------|-------|----|--------------|---------------|----|--------------|---------------|
|                        |        |       | pwMS |              |               | HC |              |               | pwMS  |    |              | HC            |    |              |               |
| Jump Parameters        | Sex    | Age   | N    | Mean (±SD)   | CI 95%        | N  | Mean (±SD)   | CI 95%        | BMI   | N  | Mean (±SD)   | CI 95%        | N  | Mean (±SD)   | CI 95%        |
| Braking Time           | Male   | 18-30 | 12   | 0.20 ± 0.05  | 0.16 – 0.23   | 13 | 0.17 ± 0.04  | 0.14 – 0.19   | 18-25 | 29 | 0.20 ± 0.05  | 0.18 – 0.22   | 23 | 0.17 ± 0.04  | 0.156 – 0.19  |
|                        |        | 31-49 | 41   | 0.21 ± 0.07  | 0.19 – 0.24   | 22 | 0.18 ± 0.06  | 0.15 – 0.20   | 25-30 | 17 | 0.24 ± 0.07  | 0.20 – 0.27   | 11 | 0.18 ± 0.08  | 0.12 – 0.23   |
|                        |        | 50-65 | 1    | 0.23         | -             | 4  | 0.20 ± 0.02  | 0.17 – 0.23   | 30+   | 8  | 0.20 ± 0.08  | 0.13 – 0.27   | 5  | 0.18 ± 0.04  | 0.13 – 0.23   |
|                        | Female | 18-30 | 32   | 0.21 ± 0.10  | 0.17 – 0.24   | 17 | 0.18 ± 0.07  | 0.14 – 0.22   | 18-25 | 70 | 0.21 ± 0.09  | 0.19 – 0.23   | 44 | 0.18 ± 0.07  | 0.16 – 0.21   |
|                        |        | 31-49 | 64   | 0.22 ± 0.10  | 0.20 – 0.25   | 35 | 0.19 ± 0.08  | 0.16 – 0.22   | 25-30 | 26 | 0.20 ± 0.07  | 0.17 – 0.23   | 11 | 0.20 ± 0.10  | 0.14 – 0.27   |
|                        |        | 50-65 | 14   | 0.24 ± 0.08  | 0.18 – 0.28   | 7  | 0.24 ± 0.08  | 0.16 – 0.31   | 30+   | 14 | 0.30 ± 0.12  | 0.23 – 0.37   | 4  | 0.26 ± 0.09  | 0.12 – 0.39   |
| Propulsive Time        | Male   | 18-30 | 12   | 0.32 ± 0.08  | 0.27 – 0.37   | 13 | 0.29 ± 0.06  | 0.25 – 0.32   | 18-25 | 29 | 0.31 ± 0.06  | 0.29 – 0.33   | 23 | 0.29 ± 0.05  | 0.27 – 0.32   |
|                        |        | 31-49 | 41   | 0.32 ± 0.11  | 0.29 – 0.35   | 22 | 0.29 ± 0.06  | 0.27 – 0.32   | 25-30 | 17 | 0.32 ± 0.07  | 0.28 – 0.35   | 11 | 0.28 ± 0.05  | 0.25 – 0.32   |
|                        |        | 50-65 | 1    | 0.30         | -             | 4  | 0.32 ± 0.03  | 0.26 – 0.37   | 30+   | 8  | 0.37 ± 0.22  | 0.18 – 0.55   | 5  | 0.30 ± 0.10  | 0.18 – 0.42   |
|                        | Female | 18-30 | 32   | 0.31 ± 0.08  | 0.28 – 0.33   | 17 | 0.27 ± 0.05  | 0.25 – 0.30   | 18-25 | 70 | 0.32 ± 0.09  | 0.29 – 0.34   | 44 | 0.27 ± 0.05  | 0.26 – 0.29   |
|                        |        | 31-49 | 64   | 0.31 ± 0.09  | 0.29 – 0.33   | 35 | 0.28 ± 0.05  | 0.26 – 0.30   | 25-30 | 26 | 0.30 ± 0.07  | 0.28 – 0.33   | 11 | 0.29 ± 0.07  | 0.25 – 0.34   |
|                        |        | 50-65 | 14   | 0.33 ± 0.09  | 0.28 – 0.38   | 7  | 0.29 ± 0.06  | 0.23 – 0.35   | 30+   | 14 | 0.30 ± 0.06  | 0.27 – 0.33   | 4  | 0.30 ± 0.09  | 0.15 – 0.44   |
| Flight Time            | Male   | 18-30 | 12   | 0.38 ± 0.06  | 0.35 – 0.42   | 13 | 0.41 ± 0.05  | 0.38 – 0.44   | 18-25 | 29 | 0.37 ± 0.04  | 0.36 – 0.39   | 23 | 0.40 ± 0.04  | 0.38 – 0.42   |
|                        |        | 31-49 | 41   | 0.35 ± 0.05  | 0.33 – 0.37   | 22 | 0.38 ± 0.04  | 0.36 – 0.40   | 25-30 | 17 | 0.35 ± 0.06  | 0.31 – 0.38   | 11 | 0.38 ± 0.05  | 0.35 – 0.41   |
|                        |        | 50-65 | 1    | 0.30         | -             | 4  | 0.36 ± 0.01  | 0.34 – 0.38   | 30+   | 8  | 0.31 ± 0.04  | 0.28 – 0.35   | 5  | 0.35 ± 0.05  | 0.29 – 0.41   |
|                        | Female | 18-30 | 32   | 0.31 ± 0.05  | 0.29 – 0.32   | 17 | 0.35 ± 0.02  | 0.34 – 0.36   | 18-25 | 70 | 0.30 ± 0.04  | 0.29 – 0.31   | 44 | 0.33 ± 0.03  | 0.32 – 0.34   |
|                        |        | 31-49 | 64   | 0.29 ± 0.04  | 0.28 – 0.30   | 35 | 0.32 ± 0.03  | 0.31 – 0.33   | 25-30 | 26 | 0.28 ± 0.04  | 0.27 – 0.30   | 11 | 0.31 ± 0.04  | 0.29 – 0.34   |
|                        |        | 50-65 | 14   | 0.25 ± 0.03  | 0.23 – 0.27   | 7  | 0.25 ± 0.03  | 0.21 – 0.28   | 30+   | 14 | 0.24 ± 0.04  | 0.22 – 0.26   | 4  | 0.23 ± 0.02  | 0.20 – 0.27   |
| Force at Zero Velocity | Male   | 18-30 | 12   | 14.69 ± 6.19 | 10.76 – 18.63 | 13 | 17.33 ± 7.59 | 12.74 – 21.92 | 18-25 | 29 | 13.36 ± 5.38 | 11.31 – 15.40 | 23 | 18.37 ± 4.49 | 16.43 – 20.31 |
|                        |        | 31-49 | 41   | 11.65 ± 5.93 | 9.78 – 13.52  | 22 | 19.02 ± 4.78 | 16.90 – 21.14 | 25-30 | 17 | 11.53 ± 6.43 | 8.22 – 14.84  | 11 | 19.86 ± 6.95 | 15.19 – 24.53 |

|                |        |       |    |              |               |    |              |               |       |    |              |               |    |              |               |
|----------------|--------|-------|----|--------------|---------------|----|--------------|---------------|-------|----|--------------|---------------|----|--------------|---------------|
|                |        | 50-65 | 1  | 7.36         | -             | 4  | 15.68 ± 3.91 | 9.96 – 21.91  | 30+   | 8  | 9.74 ± 7.27  | 3.66 – 15.82  | 5  | 13.10 ± 6.71 | 4.77 – 21.44  |
|                | Female | 18-30 | 32 | 10.19 ± 4.83 | 8.45 – 11.93  | 17 | 15.77 ± 5.45 | 12.96 – 18.57 | 18-25 | 70 | 10.94 ± 5.62 | 9.60 – 12.27  | 44 | 15.34 ± 5.05 | 13.80 – 16.88 |
|                |        | 31-49 | 64 | 10.47 ± 5.66 | 9.05 – 11.88  | 35 | 14.63 ± 5.44 | 12.76 – 16.49 | 25-30 | 26 | 10.04 ± 5.27 | 7.91 – 12.17  | 11 | 14.31 ± 6.39 | 10.02 – 18.61 |
|                |        | 50-65 | 14 | 10.17 ± 6.19 | 6.59 – 13.74  | 7  | 13.88 ± 5.79 | 8.52 – 19.23  | 30+   | 14 | 7.98 ± 4.51  | 5.38 – 10.58  | 4  | 11.15 ± 6.59 | 0.67 – 21.63  |
| Peak Force     | Male   | 18-30 | 12 | 20.37 ± 1.93 | 19.14 – 21.56 | 13 | 23.31 ± 3.00 | 21.49 – 25.12 | 18-25 | 29 | 20.13 ± 1.77 | 19.46 – 20.80 | 23 | 21.72 ± 2.50 | 20.64 – 22.80 |
|                |        | 31-49 | 41 | 19.71 ± 1.64 | 19.19 – 20.22 | 22 | 21.78 ± 2.13 | 20.84 – 22.72 | 25-30 | 17 | 19.24 ± 1.56 | 18.43 – 20.03 | 11 | 23.11 ± 3.15 | 20.99 – 25.26 |
|                |        | 50-65 | 1  | 18.17        |               | 4  | 19.00 ± 0.73 | 17.82 – 20.16 | 30+   | 8  | 19.96 ± 1.66 | 18.57 – 21.35 | 5  | 20.87 ± 1.23 | 19.35 – 22.34 |
|                | Female | 18-30 | 32 | 19.08 ± 2.05 | 18.34 – 19.81 | 17 | 20.57 ± 1.65 | 19.72 – 21.42 | 18-25 | 70 | 18.94 ± 1.98 | 18.47 – 19.42 | 44 | 20.06 ± 1.84 | 19.50 – 20.62 |
|                |        | 31-49 | 64 | 18.78 ± 1.96 | 18.29 – 19.27 | 35 | 19.88 ± 1.79 | 19.26 – 20.49 | 25-30 | 26 | 18.48 ± 2.01 | 17.67 – 19.29 | 11 | 19.73 ± 1.57 | 18.68 – 20.79 |
|                |        | 50-65 | 14 | 17.72 ± 1.97 | 16.68 – 18.86 | 7  | 18.08 ± 2.19 | 16.05 – 20.10 | 30+   | 14 | 18.13 ± 2.14 | 16.89 – 19.37 | 4  | 18.08 ± 3.06 | 13.21 – 22.96 |
| Negative Power | Male   | 18-30 | 12 | 4.29 ± 0.99  | 3.66 – 4.92   | 13 | 5.70 ± 1.37  | 4.86 – 6.53   | 18-25 | 29 | 4.21 ± 1.10  | 3.79 – 4.63   | 23 | 5.02 ± 1.23  | 4.49 – 5.55   |
|                |        | 31-49 | 41 | 3.87 ± 1.17  | 3.50 – 4.24   | 22 | 4.76 ± 1.13  | 4.26 – 5.26   | 25-30 | 17 | 3.83 ± 0.89  | 3.38 – 4.29   | 11 | 5.42 ± 1.31  | 4.54 – 6.30   |
|                |        | 50-65 | 1  | 3.37         | -             | 4  | 4.25 ± 0.88  | 2.85 – 5.65   | 30+   | 8  | 3.31 ± 1.50  | 2.06 – 4.56   | 5  | 4.12 ± 1.14  | 2.70 – 5.54   |
|                | Female | 18-30 | 32 | 3.19 ± 1.11  | 2.79 – 3.59   | 17 | 4.19 ± 1.17  | 3.58 – 4.79   | 18-25 | 70 | 3.23 ± 1.09  | 2.97 – 3.49   | 44 | 3.92 ± 1.06  | 3.60 – 4.24   |
|                |        | 31-49 | 64 | 3.17 ± 0.98  | 2.92 – 3.41   | 35 | 3.86 ± 0.92  | 3.4 – 4.17    | 25-30 | 26 | 3.06 ± 0.84  | 2.72 – 3.40   | 11 | 3.93 ± 0.89  | 3.33 – 4.53   |
|                |        | 50-65 | 14 | 2.38 ± 0.98  | 1.81 – 2.94   | 7  | 3.00 ± 0.80  | 2.26 – 3.75   | 30+   | 14 | 2.32 ± 0.82  | 1.84 – 2.78   | 4  | 2.85 ± 0.63  | 1.84 – 3.85   |
| Positive Power | Male   | 18-30 | 12 | 18.17 ± 3.49 | 15.95 – 20.38 | 13 | 19.54 ± 3.97 | 17.13 – 21.93 | 18-25 | 29 | 17.63 ± 2.83 | 16.56 – 18.70 | 23 | 18.78 ± 2.76 | 17.59 – 19.97 |
|                |        | 31-49 | 41 | 16.19 ± 3.42 | 15.11 – 17.28 | 22 | 17.79 ± 2.41 | 16.72 – 18.86 | 25-30 | 17 | 16.07 ± 3.91 | 14.06 – 18.08 | 11 | 17.84 ± 2.95 | 15.85 – 19.82 |
|                |        | 50-65 | 1  | 12.79        | -             | 4  | 16.00 ± 0.38 | 15.40 – 16.60 | 30+   | 8  | 13.79 ± 3.52 | 10.84 – 16.72 | 5  | 16.27 ± 4.38 | 10.84 – 21.70 |
|                | Female | 18-30 | 32 | 14.47 ± 3.14 | 13.34 – 15.60 | 17 | 15.96 ± 0    | 15.23 – 16.69 | 18-25 | 70 | 14.09 ± 2.52 | 13.48 – 14.69 | 44 | 15.04 ± 2.39 | 14.32 – 15.77 |
|                |        | 31-49 | 64 | 13.63 ± 2.28 | 13.06 – 14.20 | 35 | 14.56 ± 2.46 | 13.72 – 15.40 | 25-30 | 26 | 13.59 ± 2.55 | 12.56 – 14.61 | 11 | 14.12 ± 1.98 | 12.79 – 15.45 |
|                |        | 50-65 | 14 | 11.43 ± 2.29 | 10.11 – 12.75 | 7  | 11.22 ± 1.53 | 9.80 – 12.63  | 30+   | 14 | 11.15 ± 2.64 | 9.62 – 12.67  | 4  | 10.57 ± 1.06 | 8.88 – 12.26  |
| Jump Height    | Male   | 18-30 | 12 | 18.52 ± 5.27 | 15.17 – 21.87 | 13 | 21.21 ± 4.82 | 18.29 – 24.12 | 18-25 | 29 | 17.49 ± 4.01 | 15.96 – 19.00 | 23 | 19.77 ± 4.41 | 17.86 – 21.68 |
|                |        | 31-49 | 41 | 15.40 ± 4.20 | 14.08 – 16.73 | 22 | 17.84 ± 4.19 | 15.98 - 19.70 | 25-30 | 17 | 15.22 ± 5.15 | 12.57 – 17.87 | 11 | 18.22 ± 4.39 | 15.27 – 21.17 |
|                |        | 50-65 | 1  | 10.80        | -             | 4  | 15.76 ± 1.09 | 14.03 – 17.49 | 30+   | 8  | 12.33 ± 3.20 | 9.66 – 15.01  | 5  | 15.20 ± 4.27 | 9.90 – 20.51  |
|                | Female | 18-30 | 32 | 11.84 ± 3.55 | 10.56 – 13.11 | 17 | 14.82 ± 1.96 | 13.81 – 15.83 | 18-25 | 70 | 11.47 ± 2.70 | 10.83 – 12.11 | 44 | 13.45 ± 2.78 | 12.61 – 14.30 |
|                |        | 31-49 | 64 | 10.64 ± 2.61 | 9.98 – 11.29  | 35 | 12.88 ± 2.56 | 12.00 – 13.76 | 25-30 | 26 | 10.18 ± 3.10 | 8.93 – 11.43  | 11 | 12.38 ± 2.75 | 10.54 – 14.23 |
|                |        | 50-65 | 14 | 7.77 ± 1.99  | 6.62 – 8.91   | 7  | 7.50 ± 2.15  | 5.51 – 9.48   | 30+   | 14 | 7.23 ± 2.38  | 5.86 – 8.60   | 4  | 6.77 ± 1.25  | 4.78 – 8.76   |

|       |        |       |    |             |             |    |             |             |       |    |             |             |    |             |             |
|-------|--------|-------|----|-------------|-------------|----|-------------|-------------|-------|----|-------------|-------------|----|-------------|-------------|
| FTCTR | Male   | 18-30 | 12 | 0.49 ± 0.12 | 0.41 – 0.56 | 13 | 0.58 ± 0.11 | 0.52 – 0.65 | 18-25 | 29 | 0.49 ± 0.09 | 0.45 – 0.52 | 23 | 0.54 ± 0.10 | 0.49 – 0.58 |
|       |        | 31-49 | 41 | 0.46 ± 0.09 | 0.43 – 0.49 | 22 | 0.52 ± 0.08 | 0.48 – 0.56 | 25-30 | 17 | 0.43 ± 0.10 | 0.38 – 0.48 | 11 | 0.54 ± 0.08 | 0.49 – 0.59 |
|       |        | 50-65 | 1  | 0.35        | -           | 4  | 0.43 ± 0.03 | 0.38 – 0.48 | 30+   | 8  | 0.43 ± 0.09 | 0.35 – 0.51 | 5  | 0.49 ± 0.13 | 0.33 – 0.65 |
|       | Female | 18-30 | 32 | 0.44 ± 0.12 | 0.40 – 0.48 | 17 | 0.51 ± 0.08 | 0.47 – 0.55 | 18-25 | 70 | 0.43 ± 0.10 | 0.40 – 0.45 | 44 | 0.48 ± 0.09 | 0.45 – 0.51 |
|       |        | 31-49 | 64 | 0.41 ± 0.10 | 0.38 – 0.43 | 35 | 0.47 ± 0.09 | 0.44 – 0.50 | 25-30 | 26 | 0.40 ± 0.10 | 0.36 – 0.44 | 11 | 0.45 ± 0.07 | 0.40 – 0.50 |
|       |        | 50-65 | 14 | 0.34 ± 0.09 | 0.29 – 0.39 | 7  | 0.35 ± 0.08 | 0.28 – 0.42 | 30+   | 14 | 0.35 ± 0.10 | 0.29 – 0.40 | 4  | 0.33 ± 0.09 | 0.19 – 0.47 |
| RSI   | Male   | 18-30 | 12 | 2.28 ± 0.89 | 1.72 – 2.84 | 13 | 3.00 ± 0.76 | 2.54 – 3.46 | 18-25 | 29 | 2.24 ± 0.65 | 1.99 – 2.48 | 23 | 2.65 ± 0.78 | 2.31 – 2.99 |
|       |        | 31-49 | 41 | 1.94 ± 0.60 | 1.75 – 2.13 | 22 | 2.41 ± 0.65 | 2.12 – 2.70 | 25-30 | 17 | 1.80 ± 0.68 | 1.44 – 2.14 | 11 | 2.54 ± 0.61 | 2.13 – 2.95 |
|       |        | 50-65 | 1  | 1.29        | -           | 4  | 1.89 ± 0.10 | 1.73 – 2.05 | 30+   | 8  | 1.62 ± 0.58 | 1.14 – 2.11 | 5  | 2.15 ± 0.81 | 1.15 – 3.15 |
|       | Female | 18-30 | 32 | 1.66 ± 0.65 | 1.42 – 1.89 | 17 | 2.09 ± 0.49 | 1.84 – 2.34 | 18-25 | 70 | 1.57 ± 0.55 | 1.43 – 1.70 | 44 | 1.93 ± 0.58 | 1.75 – 2.10 |
|       |        | 31-49 | 64 | 1.45 ± 0.50 | 1.32 – 1.57 | 35 | 1.85 ± 0.54 | 1.66 – 2.03 | 25-30 | 26 | 1.40 ± 0.54 | 1.18 – 1.61 | 11 | 1.74 ± 0.41 | 1.46 – 2.01 |
|       |        | 50-65 | 14 | 1.03 ± 0.41 | 0.80 – 1.27 | 7  | 1.02 ± 0.37 | 0.68 – 1.36 | 30+   | 14 | 1.00 ± 0.46 | 0.74 – 1.27 | 4  | 0.88 ± 0.27 | 0.45 – 1.31 |

Abbreviation: FTCTR = Flight-Time Contraction-Time-Ratio, RSI = Reactive-Strength-Index

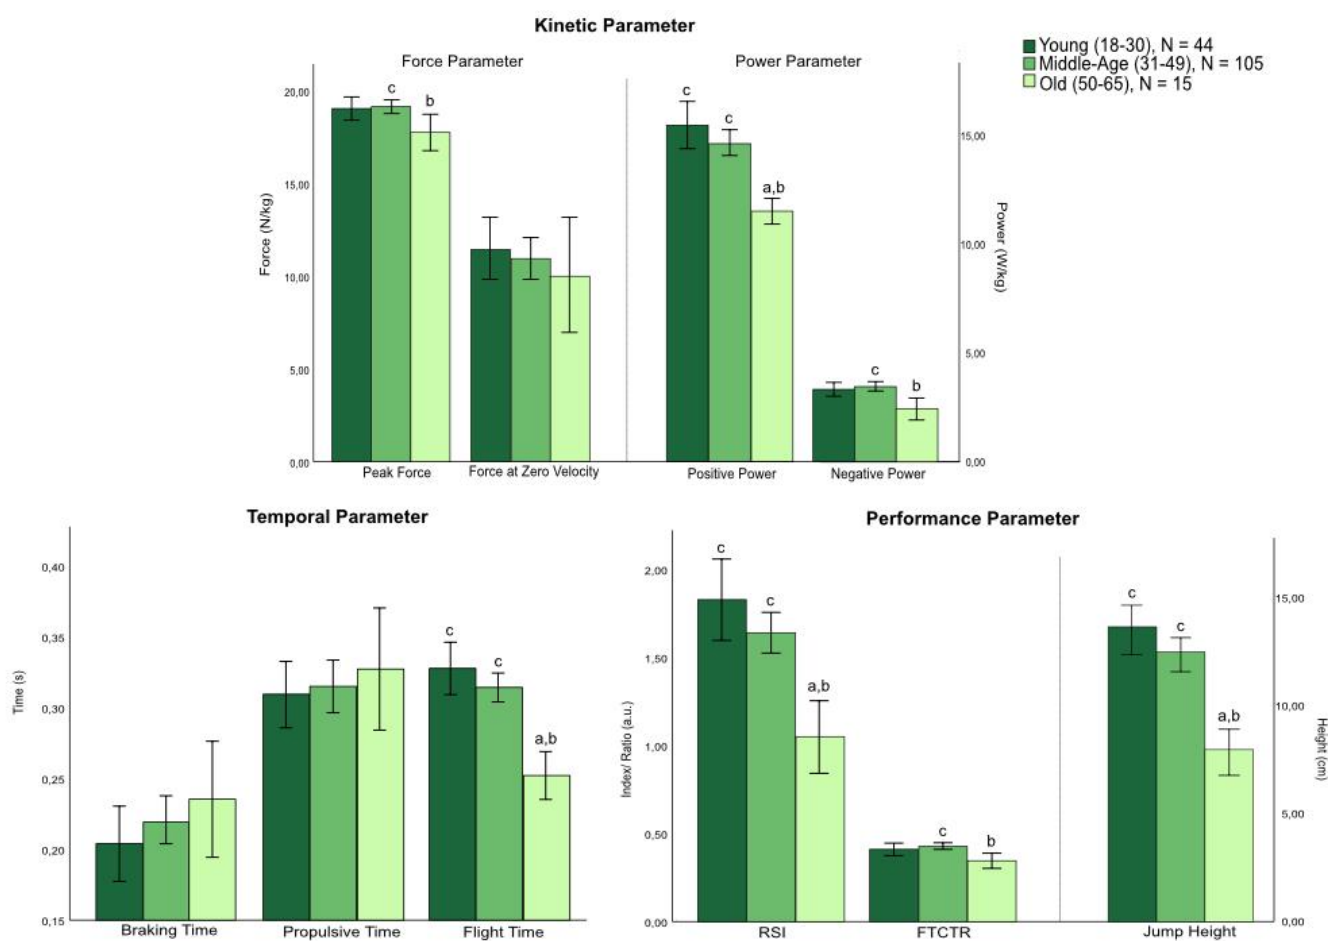

**Figure S1.** Association between age and the jumping parameters (means  $\pm$  SD) in pwMS (N = 164) based on the pairwise comparisons tests with adjustments by Bonferroni correction (model 2). Abbreviation: a = significant difference to young ( $p < 0.05$ ). b = significant difference to middle-age ( $p < 0.05$ ). c = significant difference to old ( $p < 0.05$ ). RSI = Reactive-Strength-Index, FTCTR = Flight-Time-Contraction-Time-Ratio, a.u. = arbitrary unit.

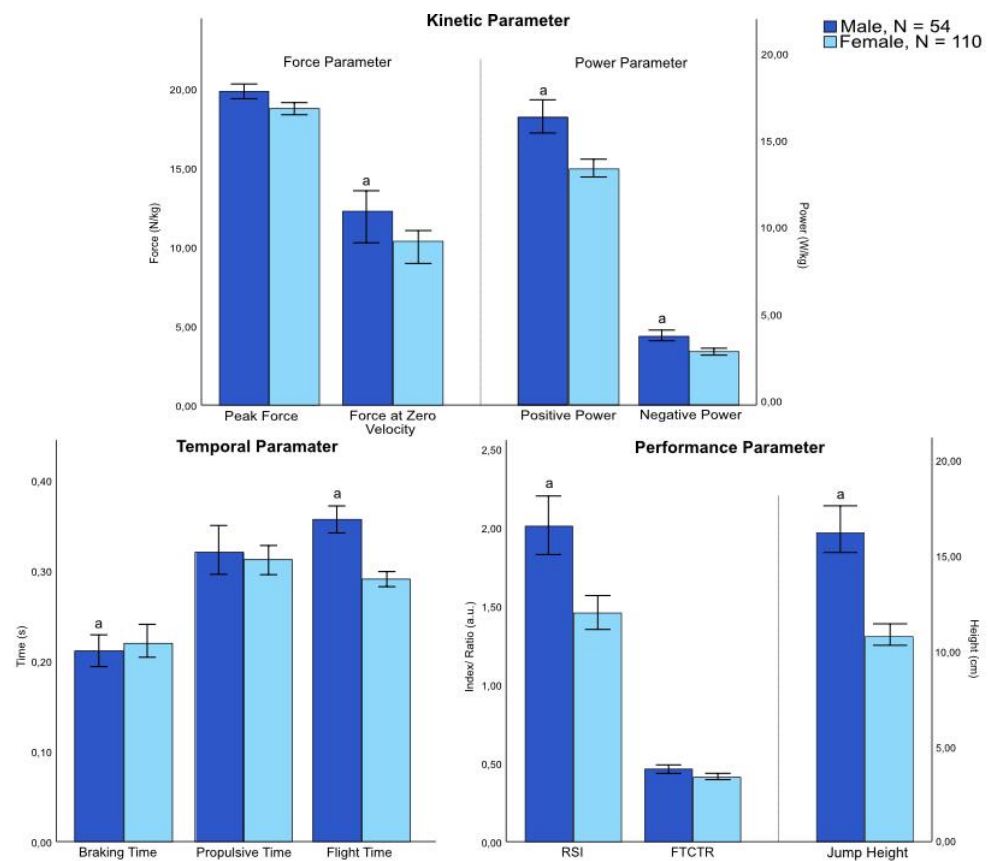

**Figure S2.** Association between sex and the jumping parameters (means  $\pm$  SD) for pwMS (N = 164) based on the pairwise comparisons tests with adjustments by Bonferroni correction (model 3). Abbreviation: a = significant difference with female ( $p < 0.05$ ). RSI = Reactive-Strength-Index, FTCTR = Flight-Time-Contraction-Time-Ratio, a.u. = arbitrary unit.

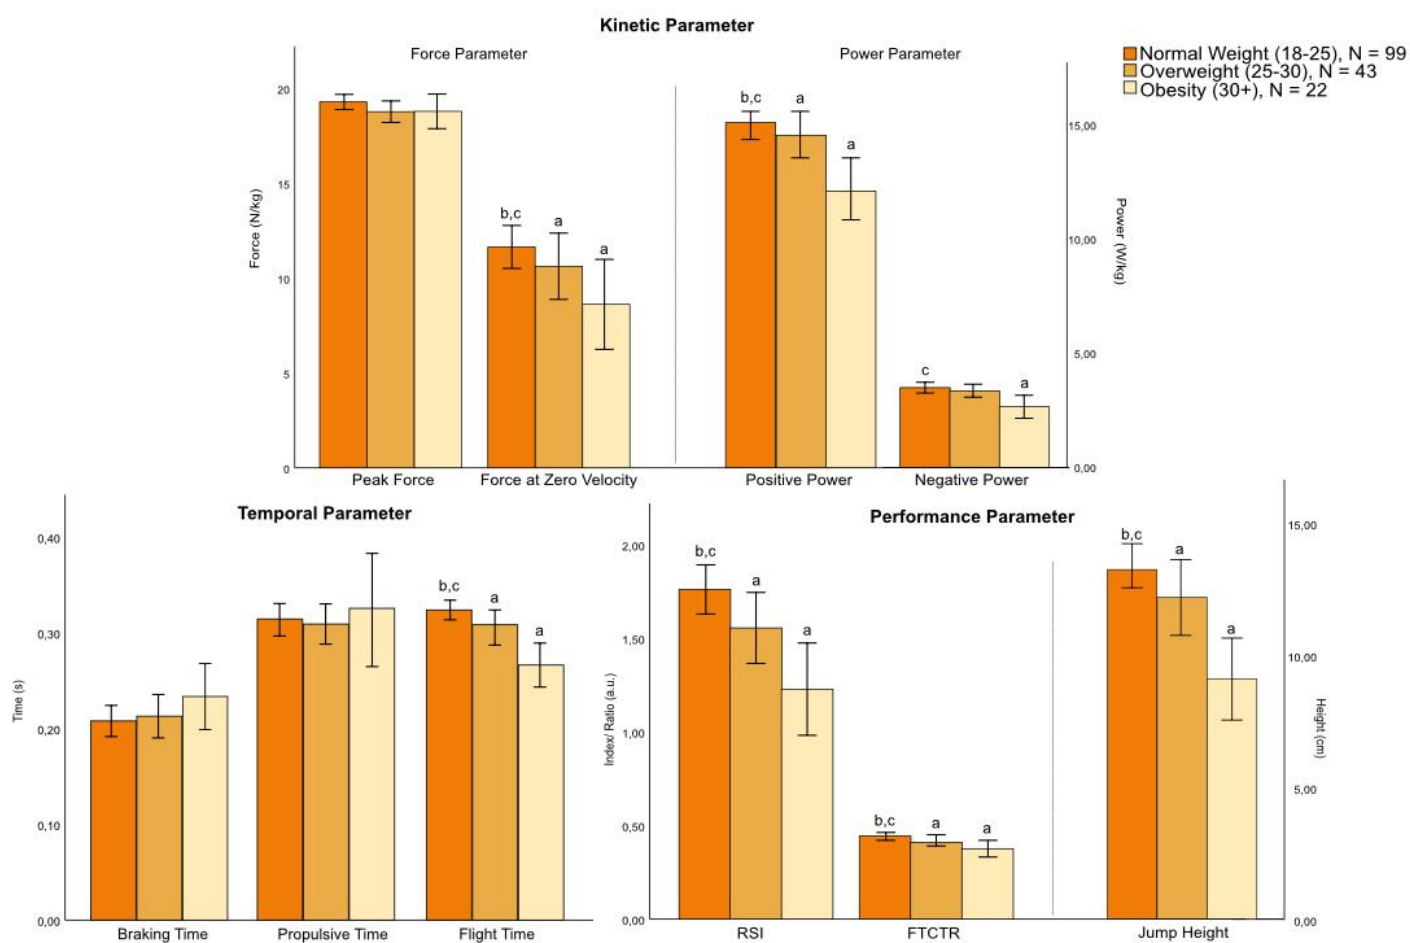

**Figure S3.** Association between BMI and the jumping parameters (means  $\pm$  SD) for pwMS (N = 164) based on the pairwise comparisons tests with adjustments by Bonferroni correction (model 4). Abbreviation: a = significant difference to normal weight ( $p < 0.05$ ). b = significant difference to overweight ( $p < 0.05$ ). c = significant difference to obesity ( $p < 0.05$ ). RSI = Reactive-Strength-Index, FTCTR = Flight-Time-Contraction-Time-Ratio, a.u. = arbitrary unit.
